# Supplementary material for: Exploring the dynamics of prefrontal cortex in the interaction between orienteering experience and cognitive performance by fNIRS
Source: Sci Rep. 2024 Jun 28;14:14918. doi: 10.1038/s41598-024-65747-1 (PMC11213913; doi:10.1038/s41598-024-65747-1)
Supplement: Supplementary file 1 — Supplementary Information. [file 41598_2024_65747_MOESM1_ESM.xlsx]

## Sheet: Non-specific（Novice）
	Spatial Memory		Mental Rotation
	Correctness	Reaction time	Correctness	Reaction time
1	0.77	1180.37	0.7	4101.43
2	0.67	1188.1	0.69	3449.03
3	0.87	1286.3	0.77	3824.3
4	0.84	1336.53	0.77	3885.27
5	0.76	1047	0.7	3410.7
6	0.63	1073.7	0.74	3213.63
7	0.8	1179.7	0.73	3594.37
8	0.75	1208.9	0.73	3699.83
9	0.7	980.87	0.75	3731.7
10	0.83	1242.47	0.69	3897.27
11	0.73	945.53	0.63	3545.03
12	0.75	1328.9	0.59	3643.8
13	0.73	1133.7	0.68	3406.93
14	0.8	928.37	0.76	3947.97
15	0.8	1284.27	0.73	4296.83
16	0.83	1159.4	0.68	3696.9
17	0.8	1066.23	0.72	4499.97
18	0.67	1187.67	0.58	4182.27
19	0.7	1022.5	0.7	4047.37
20	0.89	1160.93	0.63	3334.03
21	0.77	1315.6	0.71	3143.37
22	0.8	986.2	0.67	3693.23
23	0.7	938.83	0.73	3767.43
24	0.67	1179.37	0.63	3622.6
25	0.74	1228.77	0.66	3575.1
26	0.64	983.9	0.67	3922.13
27	0.77	1253.9	0.6	3949.47
28	0.77	1125.7	0.7	3846.43
29	0.83	1396.2	0.59	3798.8
30	0.78	1110.2	0.63	3681.37
31	0.81	1007.77	0.7	3890.67
32	0.78	1116.27	0.63	4345.2
	0.761875	1143.25	0.684063	3770.14

## Sheet: Non-specific （Expert）
	Spatial Memory		Mental Rotation
	Correctness	Reaction time	Correctness	Reaction time
1	0.77	900.23	0.81	1962.73
2	0.69	912.63	0.79	3812.43
3	0.81	1185.87	0.87	3346.3
4	0.77	1104.27	0.86	3449.93
5	0.9	992.7	0.8	3075.37
6	0.76	888.6	0.85	2934.93
7	0.71	1136.7	0.81	3248.03
8	0.67	991.43	0.77	3631.1
9	0.77	1352.53	0.8	3622.2
10	0.81	1028.97	0.77	3293.77
11	0.77	826.03	0.83	3595.17
12	0.82	1131.33	0.9	2944.77
13	0.9	1128.17	0.77	3324.43
14	0.8	1168.97	0.77	3571.9
15	0.83	973.53	0.86	2767
16	0.9	692.07	0.73	2966.07
17	0.78	1239.73	0.83	3003.2

## Sheet: fNIRS（Novice）
Spatial Memory
	Ch1	Ch2	Ch3	Ch4	Ch5	Ch6	Ch7	Ch8	Ch9	Ch10	Ch11	Ch12	Ch13	Ch14	Ch15	Ch16	Ch17	Ch18	Ch19	Ch20	Ch21	Ch22
1	-0.000373808	-0.00117342	-0.00693343	-0.00544296	-0.00517216	-0.00507017	-0.00198042	0.0021561	-0.00026271	-0.00669688	-0.00453491	-0.00313222	-0.00524657	-0.00311439	-0.00100148	0.00455796	-0.00333417	-0.00416943	-0.00364857	-0.00304956	-0.00395482	0.00425093
2	0.0014429	-0.00455028	-0.00125046	0.00453874	0.000836711	-0.00148133	-5.32955e-05	2.89839e-05	0.00211533	0.00138114	0.00202738	0.00243406	-0.00108785	-0.000917559	-0.000966244	0.000830189	0.00212354	0.000314075	0.00256083	0.00291765	0.00135358	-0.000371853
3	-0.000343237	0.000260536	0.00126542	-0.000736062	0.00140532	-0.00105084	-0.0021976	-0.000437094	-0.000906927	-0.00137676	-0.0022581	-0.000674527	-0.00182411	-0.00252387	-0.00213179	-0.00099443	-0.00140565	-0.0023415	-0.00160488	-7.23187e-05	-0.00242612	-0.00519183
4	-0.000317205	-0.000914827	0.000566599	-0.00253458	-0.00268839	-0.00199312	-0.00151947	0.000708148	-0.00183475	-0.00241629	0.00293902	0.000679887	-0.00346683	-0.000646266	-0.00152442	0.00145811	-0.00236905	-0.0016926	0.00110991	-0.000454611	-0.00372088	0.000114349
5	-0.00143967	0.000695986	-0.00405498	-0.00469127	-0.00702967	-0.00468103	-0.00303724	-0.00778343	-0.00137999	-0.00367243	-0.00935878	-0.00645994	-0.00564254	-0.00371334	-0.00248327	0.00118247	-0.0027226	-0.00708193	-0.00869617	-0.00511213	-0.00564183	-0.00204235
6	-0.000997568	-0.000743099	0.000563458	-0.000401305	-0.00151883	-0.00174905	-0.000931109	-0.000679326	-0.000563631	-0.000872464	-0.00101539	-0.000284552	-0.00163029	-0.00178173	-0.000229558	-0.000811889	-0.000788764	-0.00134475	-0.000760014	0.000376882	-0.00196701	0.000149382
7	-0.00142517	-0.0020238	-0.0024952	-0.0010375	-0.00217715	-0.00412625	-0.0036208	-0.00585934	-0.00391941	-0.00427741	-0.00262364	-0.00396167	-0.00491243	-0.00549123	-0.000110722	0.00053901	-0.00297452	-0.00201212	-0.00469626	-0.005804	-0.00541073	-0.00211674
8	0.000152167	-0.00249315	-0.00045078	0.00105842	0.0013541	0.000403365	-0.00262061	-0.0125102	6.23035e-05	-0.000471763	-0.00143913	0.000516182	0.000256867	0.00163343	0.00730241	0.00177041	9.33287e-05	-0.0010829	-0.00221489	-0.000381838	0.00107408	0.00532396
9	-0.000365638	0.000372692	0.000376541	0.000764238	-5.58473e-05	1.46889e-05	0.00042943	-0.00507947	-0.00089963	-0.00124655	-0.000143586	0.000733218	-0.000971426	-0.000645568	-0.00064437	0.00214115	-0.000387979	-0.000979528	0.00082078	-0.000313141	-0.000945584	-0.000736001
10	0.00189458	0.000148897	0.00468225	0.00291501	0.00284638	0.00208304	-0.00230452	-0.0001567	0.00110089	0.00373617	-0.00324791	0.00135545	0.00158067	-0.000981222	-0.00226659	-0.00194164	0.00157006	0.00418599	0.00281047	0.00499493	0.00142431	-0.00390673
11	-0.00208222	-0.005037	0.00208454	0.00199122	0.00103423	-0.0012918	-0.00147805	-0.00278126	-0.000602298	5.01579e-05	0.000602675	0.00119347	0.00155491	-0.00119402	-0.00243471	-0.00154725	5.01579e-05	-0.00129964	0.00107437	0.00161835	1.12356e-05	-0.0050277
12	0.000324424	-0.00147649	3.15692e-05	4.56863e-05	0.000901992	-0.000862069	0.00256698	0.0102158	5.35783e-05	1.87285e-05	4.56863e-05	0.00145192	0.00246673	-0.00176766	-0.00011882	-0.000438197	0.000503106	0.00110803	0.00174269	0.00372872	-0.00327829	0.00143282
13	-0.00452275	0.00457976	-0.00121593	-0.00276911	-0.00184399	-0.000405584	-0.00895671	-0.0136688	-0.00292069	-0.00168442	0.000458589	-0.0029457	-0.000517658	-0.00697042	-0.00838847	-0.00707312	-0.00426727	-0.00321191	-0.00339831	-0.00462482	-0.00330286	-0.00936962
14	0.000403216	0.000718324	-0.00331662	-0.00406982	-0.0044987	8.83649e-05	0.000801147	0.0200712	0.00649987	0.00187869	-0.0058749	-0.00247734	-0.00146821	-0.00120117	0.00110022	0.0126905	0.00491977	-0.00379031	-0.00898994	-0.00218376	-0.00346718	0.000240773
15	-0.00295313	-0.000320317	0.00629285	0.00689524	0.00418753	-0.00403632	-0.0266599	-0.0133303	-0.00207042	0.00461049	0.00568591	0.00197905	0.00224178	-0.0272443	-0.0220082	-0.00359992	0.00116846	0.00248344	-2.81691e-07	-0.0039841	-0.00666216	-0.02024
16	-4.39636e-05	-0.000352184	0.0109962	0.0110341	0.0110359	0.00943396	0.00476482	0.000203352	0.00224017	0.00482651	0.00677027	0.00243073	0.00689038	0.00559481	-0.00235785	-0.00411529	0.00181922	0.002474	0.0106882	0.00692328	0.00279315	0.00292134
17	0.00168405	-0.00459132	-0.000467469	0.000384152	-0.00163394	-1.05029e-05	-0.00392443	-0.00288051	-0.000837263	-0.000600908	-0.000237554	-0.000992599	5.19603e-05	-0.00126411	0.00423972	0.00237437	0.000385569	-0.000790086	-0.000726746	-0.00117777	0.00081715	0.000983451
18	0.00114559	-0.00424228	0.00151694	0.00170688	0.00359877	0.00371458	0.000585191	0.00248738	-0.00336711	0.00060609	-0.000263979	0.0029968	0.00304655	0.00229386	0.00243473	0.000958427	-0.00436082	0.00567015	0.00772154	0.00784262	0.00308987	-0.00324442
19	0.00390617	-0.00373277	0.0113625	0.00549379	0.0131855	0.00814553	-0.00765148	0.00310996	-0.0133734	0.0203751	-0.00329773	0.01137	0.0109656	0.00784772	0.00536872	0.0160688	0.00625326	0.00344842	0.00697716	0.00848998	0.00950628	0.00382609
20	0.00269618	0.0117332	0.00551006	0.00969195	0.00994922	0.00569083	0.00295887	-0.00505848	0.00274839	0.00330678	0.00314926	1.75163e-05	0.00496341	-0.00681321	-0.0010411	0.00223187	0.00240222	0.00111955	0.00202726	-0.000952803	0.00424565	0.00384429
21	8.66752e-05	-0.000677222	-0.0099726	-0.00692487	-0.00321039	0.00931619	-0.000434187	0.00361494	-0.00754513	-0.000335646	3.37127e-05	0.000189264	0.0111013	-0.00158918	-0.00175064	0.00117956	-0.00480712	0.00808238	-0.000221044	-0.00836341	-0.00446171	0.000201204
22	0.00133286	-0.000352184	0.00421132	0.00289598	0.00192159	0.0014994	-0.000569	-0.00719972	-9.58666e-05	0.00123795	0.00143808	0.000806373	0.00172428	-0.00168709	0.00633529	0.0105119	0.00319477	0.000357211	-0.00126843	-0.00174008	0.00342916	-0.00293847
23	-3.32641e-05	0.000353473	-0.00203079	-0.00240366	-0.00168366	-0.00166177	0.00559209	0.00490015	-0.00394436	-0.00419317	-0.000500459	0.00173456	-0.00275066	0.00100673	0.000775365	0.00144151	-0.000468207	-0.000440948	-0.000196144	0.00253038	0.00164369	-0.000178075
24	0.00269618	-0.00250383	0.00551006	0.00969195	0.00994922	0.00569083	0.00295887	-0.00505848	0.00274839	0.00330678	0.00314926	1.75163e-05	0.00496341	0.00681321	-0.0010411	0.00223187	0.00240222	0.00111955	0.00202726	-0.000952803	0.00424565	0.00384429
25	-0.000969784	-0.00249781	-0.0023653	-0.00338533	-0.00572527	-0.00231834	0.000322189	-0.00305591	-0.0017474	-0.00456553	-0.00750818	-0.0141056	-0.00614817	0.00199206	0.0162532	0.00889392	0.000169597	-0.00778665	-0.0120208	-0.00731787	-0.00208105	0.01165
26	0.00893446	-0.00708975	0.00772428	0.00866213	0.00525346	0.00346362	-0.000935284	0.00917676	0.00747359	0.0058842	0.00421164	0.00388252	0.00666167	-0.00308801	-0.00255406	0.000893675	0.00657798	0.00876166	0.00612355	0.00470623	0.00172042	-0.0012283
27	-0.0020632	-0.00318567	-0.00129311	0.000209737	-0.000199203	-0.00113515	-0.00294912	-0.00109271	-0.00293016	-0.00501627	0.00035554	8.77157e-05	-0.00447802	-0.00200194	-0.00343463	0.0104969	-0.00310636	-0.00555073	0.000313624	-0.00627766	-0.00315481	-0.00982869
28	0.000979526	0.00632543	0.00553629	0.00225378	0.00523169	0.00364422	0.00128798	0.00123138	0.00442972	0.00669994	0.00706339	0.00609816	0.00559047	0.00392567	-0.00208895	0.00154621	0.00427243	0.00452597	0.00315962	0.00347018	0.00274032	-0.00169519
29	-0.000695404	0.00228942	-0.00424279	-0.005352	-0.00790409	-0.0023727	0.00358635	-0.010303	-0.0017606	0.000570227	0.00034764	-0.00975423	0.000409178	0.00169639	0.00743901	-0.00655172	-0.00562383	-0.0113546	-0.00938462	-0.016901	0.00132737	0.00759142
30	-0.000316688	0.00503139	-0.00146939	-0.00217058	-0.00212511	-0.00330853	-0.00219473	-0.00270778	-0.00149898	-0.00265546	-0.00257905	-0.00165411	-0.00235221	-0.00158605	-0.00106105	-0.000488197	-0.0023941	-0.00195146	-0.00153062	-0.000963586	-0.00164647	-0.00557668
31	-0.00567943	0.00133149	0.00230015	0.00291273	0.00503718	0.00172022	-0.00517074	0.0107202	-0.00501541	-0.000367231	0.00160966	-0.000668195	0.00223633	-0.00314656	-0.00533189	-0.00541467	-0.00247638	-0.0012088	-0.000884014	0.00114378	-0.00135233	-0.00437188
32	-0.000928335	0.00133945	-0.00724313	-0.00387643	-0.0043565	-0.00322009	-0.00129208	-0.000452007	-0.0041248	-0.00480148	-0.00540373	-0.00700522	-0.00603698	-0.00760191	0.00375584	-0.00531811	-0.0037361	-0.0039229	-0.00356838	-0.00756408	-0.00395539	0.00393145
心理旋转
1	0.00237463	-0.00140309	0.00377997	0.00703207	0.00200106	0.00201075	0.00243377	0.00419587	0.000610759	-0.00395081	0.00661403	0.00644654	0.00109052	0.00224746	0.00132317	0.00194331	0.000799232	-0.0110214	0.00776427	0.00375987	0.000912795	0.00283502
2	0.00167076	-0.00051013	-0.00436405	-4.48633e-05	-0.0012873	-0.00391006	-0.00183538	0.000245321	-0.00258104	0.000424168	-0.000435557	-0.0033214	-0.000491786	-2.17914e-05	-0.00136327	-0.0019971	-0.00212475	0.000332058	-0.000244753	-0.00643427	-0.000382698	-0.000500076
3	0.0153981	-5.19053e-05	-0.00128035	0.00252534	-0.0014109	-0.00048028	-0.000496631	0.00253074	-0.00260749	-0.00366354	-0.00435319	-0.00214407	-0.00218819	0.000417531	0.000668877	-0.00231831	-0.00155864	0.000570714	-0.000266465	0.00171627	-0.00246712	0.000215293
4	0.0218051	0.00117609	0.010242	-0.00259599	0.00337412	0.0030589	-0.000244506	0.00145688	0.000382538	0.00268085	0.00674278	0.00958339	0.00331432	0.00330631	-6.6175e-05	-0.000296952	-0.00692294	0.0010913	-0.00495186	0.00644346	-0.000192534	0.00105321
5	0.00127597	0.000544657	0.000901378	0.00363406	0.00453818	0.00200941	-0.00166088	0.00308045	-0.00168299	-0.000809637	0.000623911	0.00151339	0.00155952	-0.00113448	-0.00731445	-0.00553251	-0.00102851	-0.00498578	0.00190655	0.00381575	-0.00120864	-0.00941478
6	0.00567508	0.0100374	0.00634089	0.00268479	0.00304252	0.00449039	0.00155208	0.000863468	0.0059458	0.00620625	0.00557042	0.00260395	0.00333804	0.00179427	0.000373635	0.00219964	0.00333068	0.00167903	0.00150247	4.92109e-05	0.00416928	0.00303158
7	-0.000630297	-0.00410911	-0.00452844	-0.000715896	-0.000446414	-0.00226956	-0.00532497	-0.000380105	-0.0016694	-0.00362177	-0.00173412	0.000109238	-0.00239209	-0.00331138	-0.00226421	0.000660105	-0.00163913	0.00214729	-0.00134011	-0.00532925	-0.00517137	-0.000406187
8	-0.000451585	0.000844035	0.00201405	0.00227695	-0.00230885	-0.000876118	-0.00828552	0.000116159	-0.000406896	0.000920515	0.00408382	0.00238213	-0.0019084	-0.00654318	-0.0149269	-0.0164183	0.00054683	0.00267717	0.00378748	0.0012727	-0.00375295	-0.0221577
9	1.95712e-05	0.001438	0.0038045	0.00426338	0.0040261	-3.42212e-05	2.97838e-05	6.50131e-05	0.00137951	0.00212628	0.00403319	-0.00274646	0.0020465	0.000846882	-0.00676541	0.00783104	-0.000254141	-0.00186456	0.0056015	-0.00486597	-0.000551218	-0.0107135
10	0.000737374	0.000566565	0.00207226	0.00113476	-0.00128296	-0.000389543	-0.00125615	-0.00353701	-0.000179563	-0.00151591	5.88629e-05	-0.000644159	-0.000634102	-0.000810918	2.9346e-05	-0.000339937	0.000237657	-0.00133372	0.0015032	-0.000269289	0.000900318	0.000898563
11	-0.000641632	-0.000348525	0.000264296	0.00308706	0.00336547	0.00138448	0.00242275	-0.00158406	0.000974244	0.00169306	0.00192863	0.00369415	3.53788e-05	-0.000365494	-0.00306267	-0.00382129	0.000556386	0.00493619	0.00138231	0.00210092	-0.00210055	0.00612767
12	-0.00152385	0.00943849	0.00547877	0.0175184	0.0137464	0.00783361	-0.00208527	0.000226143	0.0101998	0.00566702	0.0127917	0.0180683	0.0128492	0.0104571	0.0114713	0.0210791	0.00456341	0.00607362	0.0212612	0.0148351	0.0127314	0.0211331
13	0.000845837	-0.000829378	-0.0036411	-0.000963397	-9.61145e-05	-0.0005873	-0.000960556	-0.00518409	-0.00758326	0.000666803	-0.00127382	0.000512997	-0.000585093	-0.000591447	-0.00318392	-0.0113818	-0.00415744	0.00147101	-0.000421441	-0.0030413	-0.00185789	-0.00416646
14	0.00857062	0.00280485	0.00757313	0.00496312	0.00574188	0.00262987	0.00919177	0.00111831	0.00127961	0.00283917	0.00330812	0.00352639	0.0037298	0.0114447	0.00880663	0.000421983	-0.000435688	0.00289831	0.00245349	0.00906126	0.00879338	0.0131852
15	0.00141132	-0.00146733	0.00613919	0.00634943	0.00218182	-0.000473024	-0.0104391	-0.0168999	0.0024749	0.00462219	0.00353772	-0.000789212	0.00336923	-0.0092603	-0.00687034	0.00453001	0.00462778	-0.00117408	0.00101635	0.00557929	0.00210871	0.00808988
16	0.001463	0.00241045	-0.00453636	-0.00794671	-0.0072021	-0.00318494	-0.00511748	-0.0106891	-0.00238833	-0.00197748	-0.0045096	-0.00510902	-4.6405e-05	-0.00283804	-0.0013913	-0.000811188	-0.00178557	-0.00024212	-0.00363273	-0.00265808	-0.000467929	-0.00241764
17	0.00279056	-0.00308004	-0.000994893	0.00263126	-0.00164662	0.00244386	-0.00577824	0.00354331	-0.00773666	-0.000964871	0.00333288	0.00183759	0.00220526	0.000122898	-0.0148936	0.00125607	-0.000412406	0.00267734	0.00394553	-0.000970516	0.00396299	-0.0101148
18	-0.0045849	0.00399319	0.00224421	0.0161515	0.00688198	0.00306821	-0.00142476	4.76634e-05	-0.00214199	0.00337561	-3.5175e-05	-0.00635085	0.00261765	-0.00231388	-0.00416305	0.000292198	0.00292247	0.0115388	0.00661411	-0.00856257	0.0005339	-0.0071604
19	0.00110565	0.00735708	0.00715792	0.00510326	0.0113681	0.00484597	0.00580046	0.0204086	-0.0123649	0.0135706	0.00228006	0.00557349	0.00495776	0.00384109	0.0058069	0.0165211	0.00547897	-0.0047329	0.00574389	0.0050802	0.00344641	0.00753326
20	0.00214786	-0.00192859	0.00617482	0.0076806	0.00880557	0.00715081	0.00483939	0.000929715	-0.00122334	0.00300597	0.00386413	0.00400575	0.00574247	0.00464457	-0.00017589	0.00100424	0.000908147	-0.00864739	0.00382011	0.006098	0.00327767	0.0024933
21	0.00226918	-0.000519451	0.000830497	0.00141239	0.00302673	0.00274038	0.00242169	-0.00222159	0.00131936	-0.000499289	-0.000451818	0.000691715	0.00214483	0.00302549	0.000238901	0.00267102	0.00158724	-0.007252	-0.000186502	-0.000386629	0.00153528	0.00179016
22	0.00234288	6.08148e-05	-0.00183985	-0.0114144	-0.00373342	-0.00397702	-0.00452582	0.0157703	-0.00182594	-0.00435252	-0.00753865	-0.0053713	-0.00200358	-0.00701552	-0.00562197	-0.00500403	-0.00929614	-0.00390877	-0.0158584	-0.00333697	-0.00734529	-0.00505216
23	0.00557112	-0.00706234	0.00558928	0.00295818	0.00619569	0.00453748	0.00803476	0.00665773	0.00587515	0.00589286	0.00297849	0.00331676	0.00744982	0.00618845	0.0039349	0.00457095	0.00724378	-0.00310541	0.00505062	0.0130615	0.00840049	0.00771533
24	0.00244066	0.00192859	0.00617482	0.0076806	0.00880557	0.00715081	-0.00483939	0.000929715	0.00122334	0.00300597	0.00386413	0.00400575	0.00574247	0.00464457	-0.00017589	-0.00100424	0.000908147	0.00445045	0.00382011	0.006098	0.00327767	0.0024933
25	0.00254462	0.000842056	0.00260827	0.0011639	0.00111136	-0.00141403	0.00394803	0.00484178	0.00105101	0.00162457	0.00358223	0.000392466	0.00163875	0.00229743	-0.00809642	-0.000551791	0.00249995	0.00355395	0.0029053	0.00286741	0.00256057	0.00627239
26	0.00127597	-0.00266156	-0.00365063	-0.00050914	-0.00372869	0.00407948	-0.0185638	-0.00400537	-0.00284236	-0.00310912	-0.00146659	-0.00154385	9.97563e-05	0.0134913	0.00610344	0.00737269	-0.00295082	0.00326814	-0.00182987	-0.00132879	0.0133307	0.0113652
27	0.00159969	-0.000456593	0.0011363	6.50824e-05	-8.02667e-05	0.00111521	0.00210167	0.00432881	-0.0045523	-0.00248456	2.53521e-05	-0.00298546	0.000671467	-0.000825859	0.000561646	0.0026217	0.00182842	0.00551742	-0.0022454	-0.000348955	-0.00229326	0.00292823
28	0.00741399	-0.00484069	-0.00532141	-0.0027808	-0.00287012	-0.00536754	-0.00200382	-0.000143715	-0.00431658	-0.00534132	-0.00546566	-0.00354054	-0.0033708	-0.00277316	0.00184406	0.00132185	-0.00435359	-0.00120834	-0.00248827	-0.00214151	-0.00345837	6.51507e-05
29	-0.00278848	-0.011312	-0.00202166	-0.00147668	-0.000616086	0.00393318	0.0075028	-0.00759362	0.0213241	0.0026985	-0.00176767	-0.00327476	-0.00073695	0.00552204	-0.00267533	0.00861383	-0.00200663	0.0069807	0.00180234	-0.00275892	-0.00327877	0.0105689
30	0.00292764	-0.0030796	0.000743657	-0.00215627	-0.00387069	-0.00235379	-0.00340621	0.00323732	-0.000780382	-0.00251794	0.000365339	-0.00326329	-0.000930349	-0.00388731	-0.00122147	0.00144313	-0.000660567	0.00385423	0.000154938	0.00073688	-0.00288652	0.00668374
31	0.00329037	0.00846399	-0.00994376	-0.0127506	-0.0121496	-0.00389286	0.00789474	-0.00570962	0.00168392	-0.0081447	-0.0102792	-0.0110203	-0.00946714	0.00802646	0.0112471	0.0019546	-0.00249978	-0.00283852	-0.0053922	-0.00843186	-0.0013118	0.0106302
32	0.00532278	0.00338159	-0.00432584	-0.00163792	-0.00217014	-0.000651374	-0.00398481	-0.000602524	-0.00142604	-0.00378329	-0.00498804	-0.00470749	-0.00178338	-0.00648481	-0.0197048	0.00726934	-0.00194631	0.00445045	-0.00398281	-0.00274923	-0.00506892	-0.0119353

## Sheet: fNIRS（Expert）
Spatial Memory
	Ch1	Ch2	Ch3	Ch4	Ch5	Ch6	Ch7	Ch8	Ch9	Ch10	Ch11	Ch12	Ch13	Ch14	Ch15	Ch16	Ch17	Ch18	Ch19	Ch20	Ch21	Ch22
1	-0.000639915	0.000705013	-8.97215e-05	0.0060301	-0.000640907	0.00658906	0.0032873	-0.00395635	0.00146882	0.00300354	0.00264576	0.0013904	0.00516713	0.00355705	-1.51922e-05	-0.00232432	0.00205415	0.000742881	0.00259008	-0.00140057	0.00139585	0.00210391
2	-0.0057849	0.00418937	0.00553743	0.00857093	0.00812506	0.00397823	0.00289645	-0.0112762	0.00177164	0.00374634	0.00694181	0.00864899	0.00607465	0.00287674	-0.00525689	-0.0030386	0.00444798	0.00246938	0.011248	0.00933144	0.00613844	-0.00988196
3	-0.000378835	-4.79086e-05	4.45205e-05	0.00014912	-0.00138731	-0.000191411	-0.00114625	-8.80137e-05	-0.00231744	0.00337071	-0.000226073	0.00248568	-0.00327571	0.000592273	-0.000807547	0.000608101	0.0023683	-0.000249957	-0.000481317	-0.00144254	-0.00305249	-0.000280968
4	-0.00456644	-0.00123719	-0.00162599	-0.000316346	-0.00153943	-0.00235004	0.00153502	-0.00234186	-0.0010355	-0.00155976	-0.0013218	-0.00369684	-0.000135269	0.000328877	0.000871778	0.00353583	1.67943e-05	-0.00128036	-0.00240131	-0.00281187	5.73296e-05	0.00260021
5	-0.00276016	0.00272322	0.00294891	0.0016768	0.00265015	0.00439558	0.00531592	0.00446281	0.0064977	0.00387061	0.00276922	0.0022956	0.00301162	0.00428528	0.00476867	0.00626186	0.00343873	0.00657325	0.00555511	0.00319802	0.00251599	0.00687824
6	-0.00670859	-0.00657237	-0.0100762	-0.00421567	-0.00721495	-0.00617009	0.000856131	0.0029307	-0.00396401	-0.00711059	-0.00573574	-0.00314265	-0.00301532	-0.000657174	-0.00716276	-0.00235586	-0.00272133	-0.00698559	-0.0028167	-0.000470528	0.00239531	-0.000106067
7	-0.000754392	0.0150568	0.00911783	0.0110454	0.0131679	0.00259159	0.0137153	0.00792999	-0.0052659	-0.00390699	0.010045	0.00959492	-0.0123011	-0.032382	0.00726631	0.00863742	-0.0172749	0.0121138	0.0172134	0.0064291	-0.0180869	0.00764168
8	-0.0049958	0.00022848	0.00066153	-0.000938958	-0.00118659	0.00215333	0.000956222	-5.20862e-05	-0.00686215	0.00332927	0.000180909	0.000101696	0.000411691	0.00219174	-0.000349976	0.00101782	0.00441827	0.00165738	0.00185362	0.000649925	0.000166689	-0.00115513
9	-0.00631603	-0.00865346	-0.00434459	0.000193974	-0.00663466	-0.0093859	-0.00624146	-0.00564394	0.000517464	-0.00124715	4.76035e-05	-0.000629335	-0.00275269	-0.00494959	0.000823032	0.0001151	2.55961e-05	0.00129863	-0.00134926	0.000360235	3.14724e-05	-0.0175561
10	-0.000849624	-0.00565937	-0.00443859	-0.00514471	-0.00698112	-0.00556984	-0.0040163	-0.000153028	0.000882598	-0.00540551	-0.00258919	-0.00429069	-0.00511202	-0.00307513	-0.000845098	-0.00030203	-0.00237519	-0.00284487	-0.00374763	-0.00328592	-0.00177367	-5.69617e-05
11	-0.00113157	0.00401323	0.0055434	0.00626076	0.00373945	0.0045798	-0.000208297	-0.0061937	0.0012991	0.00459794	0.00587743	0.00520794	0.00508319	0.00478284	-0.00315949	0.00593172	0.00503838	0.0032349	0.00384793	0.00184281	0.00167877	0.000444213
12	-0.00408216	-0.00962574	-0.0124439	-0.00922481	-0.00249344	-0.00791791	-0.00298008	-0.007577	0.00460516	-0.00963288	-0.00852478	-0.0115615	-0.00303393	-0.00992269	-0.00723276	-0.00603018	-0.00189026	0.012828	-0.0152113	-0.00807193	2.71847e-05	-0.00824186
13	-0.00471972	-0.00271365	-0.00275027	-0.00143283	-0.00165664	-0.0034127	-0.00227897	-0.00304271	0.0153029	7.95102e-06	-0.000936	0.000626507	0.000410676	-0.00175193	0.00376957	-0.00456066	1.22295e-05	-0.0026245	-0.00111136	-0.00140943	5.73656e-06	0.0072317
14	-0.00355766	0.00100355	-0.000155842	-0.00223389	-0.00108059	0.000490573	0.0144113	0.0125082	0.00280095	7.89566e-06	-0.00207124	0.000169978	-0.000711525	0.00758394	0.0188759	0.00797025	7.89566e-06	0.00307529	-0.000540515	0.000387656	5.70248e-06	0.0159534
15	-0.00355295	0.000487991	0.000356469	0.000634111	8.06189e-05	0.00111003	0.000803173	0.00410643	0.0047605	0.00145334	0.00229912	0.000551003	0.00101512	-0.000598321	0.00493419	-0.00392533	0.00326651	0.00407434	0.00251986	0.000832446	0.000574263	0.00405796
16	-0.00362238	-0.00245204	-0.00245854	-0.00168066	0.00126709	2.31625e-05	-0.00357217	0.00145042	0.0153029	-0.000487749	-0.0015447	3.48789e-05	0.00196682	-0.000163117	0.00230727	0.00715376	8.64885e-05	-0.00290716	-0.00481728	-0.00604387	5.82637e-05	0.00826101
17	-0.000754392	0.0150568	0.00911783	0.0110454	0.0131679	0.00259159	0.0137153	0.00792999	0.00304689	-0.00390699	0.010045	0.00959492	-0.0123011	-0.032382	0.00726631	0.00863742	-0.0172749	0.0121138	0.0172134	0.0064291	-0.0180869	0.00764168
Mental Rotation
1	-0.00276905	0.00145697	8.33818e-05	0.00570174	-0.00291304	-0.0148818	0.00195725	0.000144275	0.00207001	0.00138912	0.00176804	-0.000824372	-0.00549516	-0.00796181	0.00185205	-0.00957063	-0.00624138	1.62404e-05	0.00397124	0.00977878	-0.00480939	-0.00478137
2	-0.00382195	0.00428278	0.00543928	0.0118498	0.00779066	0.00786549	0.00681966	-0.0026442	0.00386421	0.00469686	0.00929717	0.0112415	0.00694673	0.00542112	-0.000547371	0.00217522	0.00503349	0.00588467	0.0151598	0.00947109	0.00660708	0.00225056
3	0.00477587	0.00171105	0.000445056	-0.000756906	-0.00238638	0.00108412	0.00217531	0.00387594	0.00277047	0.00197246	0.00271327	-0.000651796	0.00219146	0.00213213	0.0275714	0.00316092	0.00105859	0.00210273	0.00223488	-0.00140214	0.000959867	0.00458612
4	-0.00108647	0.00349828	0.00270986	0.00122211	0.00150876	0.00125532	2.11157e-05	0.000144178	0.000572838	-0.000248064	0.00129158	-0.00011189	0.00165429	0.00028024	0.00551117	0.00338121	4.01403e-05	0.00234394	0.00292128	0.00554113	6.04848e-05	-0.00115077
5	0.0018552	-0.00503985	-0.00804461	-0.00606944	-0.00654743	0.000591459	0.00443686	-0.00225981	-0.00609948	-0.00272904	-0.00403987	-0.00372626	-0.00288339	-0.00178397	0.00451548	-0.00024573	-0.00330987	0.00481983	0.00568009	-0.00381603	0.000313034	0.00528487
6	-0.0184765	0.00638625	0.013291	-0.00636154	0.000904968	-0.00661494	0.00248218	0.0223788	0.0215217	0.00528236	0.000511425	0.00710639	-0.000365683	0.00349268	0.00425389	0.0170642	-0.00229714	0.0018631	0.00332482	0.00782646	-0.0021025	0.0172988
7	0.0113774	0.0145161	0.0136197	0.0109166	0.0131507	0.0128689	0.0107709	0.00271484	0.0131338	0.0194313	0.0115476	0.0122947	0.0118124	0.0176553	0.00451548	0.00859245	0.00761467	0.0125591	0.0138198	-0.0141696	0.00838913	0.0104707
8	0.0018552	-0.000835943	-0.0064541	-0.00819632	-0.00479353	-0.00481772	0.00120413	-0.0140926	-0.00667747	-0.00550338	-0.00949562	-0.00826809	-0.00449642	-0.00325724	-0.000275983	0.00242091	-0.00392415	0.00672249	-0.0107743	-0.00717869	-0.0033364	0.00345116
9	0.0018552	-0.00356569	-0.00614355	-0.00431544	-0.0081524	-0.0033461	-0.0158601	-0.0300364	-0.0153747	-0.00560268	-0.00540086	-0.00550595	-0.00487277	-0.0121802	0.00250491	0.00255655	-0.0115036	0.00845847	-0.00955235	0.00967794	-0.0096812	-0.0222629
10	0.0213644	0.00125618	0.00318958	0.00354472	0.0019594	0.00381026	0.0221519	0.0365442	0.0225449	0.00580757	0.00584846	0.00653965	0.00633686	0.0221617	0.00113648	0.0303233	0.014654	0.00231381	0.0100125	0.00498114	0.0143177	0.0200536
11	-0.00451199	-0.00627964	-0.00781265	-0.0113909	-0.0078924	-0.00424485	-0.00660832	0.00276791	-0.00397108	-0.0105272	-0.01071	-0.00905957	-0.0074455	-0.00352724	0.00451548	0.00675642	-0.00708182	-0.00956284	0.00817912	-0.0109508	-0.00580408	-0.00181984
12	0.00168086	-0.00834132	0.000243913	-0.00325986	-7.86908e-05	-0.00691915	-0.000259986	0.00490103	0.00093057	-0.0108947	0.0131672	-0.0033928	-0.00329154	-0.00519383	0.0309719	0.00448979	0.00878596	0.0120565	-0.0115698	0.00290965	-6.81888e-06	-0.000403675
13	0.0018552	-0.00128843	0.00656892	0.00857619	0.00474659	0.00480146	0.00578017	0.000129228	0.00536741	-0.000267277	0.0061909	0.00251202	-0.00322862	-0.00604944	-0.00354987	-0.00185083	-0.000227962	0.00587848	0.0175254	0.0144341	5.65625e-05	-0.0024257
14	0.0018552	-0.00256715	0.00632115	-0.00702891	-0.00530949	0.00120015	0.00393645	0.0043752	-0.00577662	-0.000253148	0.00224107	-0.00122298	-0.000546373	-0.00279767	0.00143794	-0.00222684	-0.000469502	0.00101857	-0.00953218	0.0031948	-0.00038661	0.00451181
15	0.016061	0.000239428	-0.00169978	0.000606794	-0.000576017	0.00231003	0.019234	0.0248166	0.00425437	6.60641e-05	0.001175	0.00159452	-0.000378329	0.0134035	0.013519	0.0160569	0.0022904	0.00144438	0.00266611	0.00147918	0.00544405	0.0181217
16	-0.00246691	0.000575321	0.00230644	0.00192979	0.00325796	3.84588e-05	-0.00102649	-0.00254029	0.00356918	0.00111029	0.00203307	2.46274e-05	0.000832921	0.0010258	0.00143794	-0.00183435	2.77604e-05	0.00335567	0.000428327	0.00197436	9.88685e-06	-0.00970126
17	0.0113774	0.0145161	0.0136197	0.0109166	0.0131507	0.0128689	0.0107709	0.00271484	0.0131338	0.0194313	0.0115476	0.0122947	0.0118124	0.0176553	0.00260409	0.00859245	0.00761467	0.0125591	0.0138198	-0.0141696	0.00838913	0.0104707
